# Supplementary material
Source: PubMed Central journal article supplement (PMC3495739)
Supplement: rna-9-990-s01.pdf [file rna-9-990-s01.pdf]

Supplemental Material to: Ashish Patil, Clement Chan, Madhu Dyavaiah, John Rooney, Peter Dedon and Thomas Begley. Translational infidelity-induced protein stress results from a deficiency in Trm9-catalyzed tRNA modifications. *RNA Biology* 2012; 9(7); DOI: 10.4161/rna.20531;  
<http://www.landesbioscience.com/journals/rnabiology/article/20531/>

**Supplemental Figure S1.** Viability phenotypes associated with translational infidelity identified in *trm9Δ* cells.

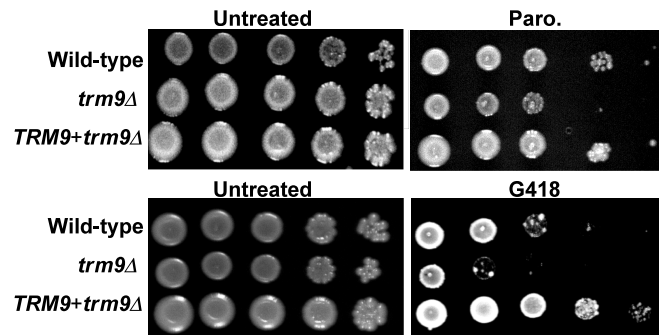

**(A)** Wild-type (CEN.PK2-1C) and *trm9Δ* cells were grown overnight in YPD at 30°C. Cultures were serially (10-fold) diluted and plated on YPD, YPD + paromomycin (350  $\mu\text{g/ml}$ ) or YPD + G418 (20  $\mu\text{g/ml}$ ).

**Supplemental Table S1**

|                     |     |     |     |     |     |     |     |     |     |     |
|---------------------|-----|-----|-----|-----|-----|-----|-----|-----|-----|-----|
| <b>W_RNR1</b>       | ATG | TAC | GTT | TAT | AAA | AGA | GAC | GGT | CGT | AAA |
| <b>O_RNR1</b>       | ATG | TAT | GTT | TAT | AAA | CGT | GAT | GGT | CGT | AAA |
| <b>Rnr1 (1-10)</b>  | M   | Y   | V   | Y   | K   | R   | D   | G   | R   | K   |
| <b>W_RNR1</b>       | GAA | CCT | GTC | CAA | TTC | GAT | AAG | ATT | ACC | GCT |
| <b>O_RNR1</b>       | GAA | CCA | GTT | CAA | TTC | GAT | AAA | ATT | ACT | GCT |
| <b>Rnr1 (11-20)</b> | E   | P   | V   | Q   | F   | D   | K   | I   | T   | A   |
| <b>W_RNR1</b>       | CGT | ATA | TCA | CGC | TTA | TGC | TAT | GGT | TTA | GAT |
| <b>O_RNR1</b>       | CGT | ATT | TCT | CGT | CTA | TGT | TAT | GGT | CTA | GAT |
| <b>Rnr1 (21-30)</b> | R   | I   | S   | R   | L   | C   | Y   | G   | L   | D   |
| <b>W_RNR1</b>       | CCA | AAA | CAT | ATC | GAC | GCC | GTT | AAG | GTC | ACC |
| <b>O_RNR1</b>       | CCA | AAA | CAT | ATT | GAT | GCT | GTT | AAA | GTT | ACT |
| <b>Rnr1 (31-40)</b> | P   | K   | H   | I   | D   | A   | V   | K   | V   | T   |
| <b>W_RNR1</b>       | CAA | CGT | ATC | ATT | TCT | GGT | GTC | TAT | GAA | GGT |
| <b>O_RNR1</b>       | CAA | CGT | ATT | ATT | TCT | GGT | GTT | TAT | GAA | GGT |
| <b>Rnr1 (41-50)</b> | Q   | R   | I   | I   | S   | G   | V   | Y   | E   | G   |
| <b>W_RNR1</b>       | GTC | ACA | ACA | ATC | GAA | CTA | GAC | AAC | TTA | GCC |
| <b>O_RNR1</b>       | GTT | ACT | ACT | ATT | GAA | CTA | GAT | AAT | CTA | GCT |
| <b>Rnr1 (51-60)</b> | V   | T   | T   | I   | E   | L   | D   | N   | L   | A   |
| <b>W_RNR1</b>       | GCT | GAA | ACA | TGC | GCT | TAT | ATG | ACT | ACT | GTT |
| <b>O_RNR1</b>       | GCT | GAA | ACT | TGT | GCT | TAT | ATG | ACT | ACT | GTT |
| <b>Rnr1 (61-70)</b> | A   | E   | T   | C   | A   | Y   | M   | T   | T   | V   |
| <b>W_RNR1</b>       | CAT | CCA | GAT | TAC | GCC | ACC | CTA | GCG | GCC | AGA |
| <b>O_RNR1</b>       | CAT | CCA | GAT | TAT | GCT | ACT | CTA | GCT | GCT | CGT |
| <b>Rnr1 (71-80)</b> | H   | P   | D   | Y   | A   | T   | L   | A   | A   | R   |
| <b>W_RNR1</b>       | ATT | GCC | ATT | TCT | AAT | TTA | CAT | AAA | CAA | ACC |
| <b>O_RNR1</b>       | ATT | GCT | ATT | TCT | AAT | CTA | CAT | AAA | CAA | ACT |
| <b>Rnr1 (81-90)</b> | I   | A   | I   | S   | N   | L   | H   | K   | Q   | T   |
| <b>W_RNR1</b>       | ACA | AAA | CAA | TTT | TCT | AAG | GTT | GTC | GAA | GAT |

|                       |     |     |     |     |     |     |     |     |     |     |
|-----------------------|-----|-----|-----|-----|-----|-----|-----|-----|-----|-----|
| <b>O_RNR1</b>         | ACT | AAA | CAA | TTC | TCT | AAA | GTT | GTT | GAA | GAT |
| <b>Rnr1 (91-100)</b>  | T   | K   | Q   | F   | S   | K   | V   | V   | E   | D   |
| <b>W_RNR1</b>         | CTT | TAT | AGA | TAC | GTC | AAT | GCT | GCT | ACT | GGT |
| <b>O_RNR1</b>         | CTA | TAT | CGT | TAT | GTT | AAT | GCT | GCT | ACT | GGT |
| <b>Rnr1 (101-110)</b> | L   | Y   | R   | Y   | V   | N   | A   | A   | T   | G   |
| <b>W_RNR1</b>         | AAG | CCC | GCT | CCC | ATG | ATC | TCT | GAT | GAT | GTC |
| <b>O_RNR1</b>         | AAA | CCA | GCT | CCA | ATG | ATT | TCT | GAT | GAT | GTT |
| <b>Rnr1 (111-120)</b> | K   | P   | A   | P   | M   | I   | S   | D   | D   | V   |
| <b>W_RNR1</b>         | TAC | AAT | ATT | GTC | ATG | GAA | AAC | AAG | GAT | AAA |
| <b>O_RNR1</b>         | TAT | AAT | ATT | GTT | ATG | GAA | AAT | AAA | GAT | AAA |
| <b>Rnr1 (121-130)</b> | Y   | N   | I   | V   | M   | E   | N   | K   | D   | K   |
| <b>W_RNR1</b>         | TTG | AAC | TCC | GCA | ATT | GTC | TAT | GAC | AGA | GAT |
| <b>O_RNR1</b>         | CTA | AAT | TCT | GCT | ATT | GTT | TAT | GAT | CGT | GAT |
| <b>Rnr1 (131-140)</b> | L   | N   | S   | A   | I   | V   | Y   | D   | R   | D   |
| <b>W_RNR1</b>         | TTT | CAG | TAC | AGT | TAT | TTT | GGT | TTT | AAA | ACT |
| <b>O_RNR1</b>         | TTC | CAG | TAT | TCT | TAT | TTC | GGT | TTC | AAA | ACT |
| <b>Rnr1 (141-150)</b> | F   | Q   | Y   | S   | Y   | F   | G   | F   | K   | T   |
| <b>W_RNR1</b>         | TTG | GAA | CGT | TCT | TAT | TTA | CTA | AGA | ATC | AAC |
| <b>O_RNR1</b>         | CTA | GAA | CGT | TCT | TAT | CTA | CTA | CGT | ATT | AAT |
| <b>Rnr1 (151-160)</b> | L   | E   | R   | S   | Y   | L   | L   | R   | I   | N   |
| <b>W_RNR1</b>         | GGT | CAA | GTG | GCC | GAA | CGT | CCA | CAA | CAT | TTA |
| <b>O_RNR1</b>         | GGT | CAA | GTT | GCT | GAA | CGT | CCA | CAA | CAT | CTA |
| <b>Rnr1 (161-170)</b> | G   | Q   | V   | A   | E   | R   | P   | Q   | H   | L   |
| <b>W_RNR1</b>         | ATT | ATG | AGA | GTC | GCA | CTA | GGC | ATC | CAC | GGT |
| <b>O_RNR1</b>         | ATT | ATG | CGT | GTT | GCT | CTA | GGT | ATT | CAT | GGT |
| <b>Rnr1 (171-180)</b> | I   | M   | R   | V   | A   | L   | G   | I   | H   | G   |
| <b>W_RNR1</b>         | AGA | GAT | ATC | GAG | GCT | GCT | TTA | GAA | ACG | TAT |
| <b>O_RNR1</b>         | CGT | GAT | ATT | GAA | GCT | GCT | CTA | GAA | ACT | TAT |
| <b>Rnr1 (181-190)</b> | R   | D   | I   | E   | A   | A   | L   | E   | T   | Y   |
| <b>W_RNR1</b>         | AAC | TTG | ATG | TCT | CTA | AAA | TAT | TTT | ACT | CAC |
| <b>O_RNR1</b>         | AAT | CTA | ATG | TCT | CTA | AAA | TAT | TTC | ACT | CAT |

|                       |     |     |     |     |     |     |     |     |     |     |
|-----------------------|-----|-----|-----|-----|-----|-----|-----|-----|-----|-----|
| <b>Rnr1 (191-200)</b> | N   | L   | M   | S   | L   | K   | Y   | F   | T   | H   |
| <b>W_RNR1</b>         | GCC | TCT | CCA | ACG | TTG | TTC | AAT | GCC | GGT | ACT |
| <b>O_RNR1</b>         | GCT | TCT | CCA | ACT | CTA | TTC | AAT | GCT | GGT | ACT |
| <b>Rnr1 (201-210)</b> | A   | S   | P   | T   | L   | F   | N   | A   | G   | T   |
| <b>W_RNR1</b>         | CCA | AAA | CCT | CAA | ATG | TCC | TCT | TGT | TTC | TTG |
| <b>O_RNR1</b>         | CCA | AAA | CCA | CAA | ATG | TCT | TCT | TGT | TTC | CTA |
| <b>Rnr1 (211-220)</b> | P   | K   | P   | Q   | M   | S   | S   | C   | F   | L   |
| <b>W_RNR1</b>         | GTT | GCC | ATG | AAG | GAG | GAC | TCT | ATC | GAG | GGG |
| <b>O_RNR1</b>         | GTT | GCT | ATG | AAA | GAA | GAT | TCT | ATT | GAA | GGT |
| <b>Rnr1 (221-230)</b> | V   | A   | M   | K   | E   | D   | S   | I   | E   | G   |
| <b>W_RNR1</b>         | ATT | TAC | GAC | ACC | TTG | AAG | GAA | TGT | GCT | TTG |
| <b>O_RNR1</b>         | ATT | TAT | GAT | ACT | CTA | AAA | GAA | TGT | GCT | CTA |
| <b>Rnr1 (231-240)</b> | I   | Y   | D   | T   | L   | K   | E   | C   | A   | L   |
| <b>W_RNR1</b>         | ATT | TCC | AAA | ACT | GCT | GGT | GGT | ATT | GGT | CTA |
| <b>O_RNR1</b>         | ATT | TCT | AAA | ACT | GCT | GGT | GGT | ATT | GGT | CTA |
| <b>Rnr1 (241-250)</b> | I   | S   | K   | T   | A   | G   | G   | I   | G   | L   |
| <b>W_RNR1</b>         | CAT | ATC | CAT | AAC | ATT | CGT | TCA | ACT | GGT | TCT |
| <b>O_RNR1</b>         | CAT | ATT | CAT | AAT | ATT | CGT | TCT | ACT | GGT | TCT |
| <b>Rnr1 (251-260)</b> | H   | I   | H   | N   | I   | R   | S   | T   | G   | S   |
| <b>W_RNR1</b>         | TAC | ATT | GCT | GGT | ACA | AAC | GGT | ACT | TCT | AAC |
| <b>O_RNR1</b>         | TAT | ATT | GCT | GGT | ACT | AAT | GGT | ACT | TCT | AAT |
| <b>Rnr1 (261-270)</b> | Y   | I   | A   | G   | T   | N   | G   | T   | S   | N   |
| <b>W_RNR1</b>         | GGT | TTA | ATT | CCT | ATG | ATT | CGT | GTT | TTC | AAT |
| <b>O_RNR1</b>         | GGT | CTA | ATT | CCA | ATG | ATT | CGT | GTT | TTC | AAT |
| <b>Rnr1 (271-280)</b> | G   | L   | I   | P   | M   | I   | R   | V   | F   | N   |
| <b>W_RNR1</b>         | AAC | ACT | GCC | CGT | TAT | GTT | GAC | CAG | GGT | GGT |
| <b>O_RNR1</b>         | AAT | ACT | GCT | CGT | TAT | GTT | GAT | CAG | GGT | GGT |
| <b>Rnr1 (281-290)</b> | N   | T   | A   | R   | Y   | V   | D   | Q   | G   | G   |
| <b>W_RNR1</b>         | AAT | AAA | AGA | CCT | GGT | GCG | TTT | GCC | CTT | TAC |
| <b>O_RNR1</b>         | AAT | AAA | CGT | CCA | GGT | GCT | TTC | GCT | CTA | TAT |
| <b>Rnr1 (291-300)</b> | N   | K   | R   | P   | G   | A   | F   | A   | L   | Y   |



|                       |     |     |     |     |     |     |     |     |     |     |
|-----------------------|-----|-----|-----|-----|-----|-----|-----|-----|-----|-----|
| <b>W_RNR1</b>         | ACA | CCT | TTC | GTT | GTT | TAC | AAG | GAT | GCT | TGT |
| <b>O_RNR1</b>         | ACT | CCA | TTC | GTT | GTT | TAT | AAA | GAT | GCT | TGT |
| <b>Rnr1 (401-410)</b> | T   | P   | F   | V   | V   | Y   | K   | D   | A   | C   |
|                       |     |     |     |     |     |     |     |     |     |     |
| <b>W_RNR1</b>         | AAC | AGA | AAA | TCT | AAT | CAA | AAA | AAC | TTA | GGT |
| <b>O_RNR1</b>         | AAT | CGT | AAA | TCT | AAT | CAA | AAA | AAT | CTA | GGT |
| <b>Rnr1 (411-420)</b> | N   | R   | K   | S   | N   | Q   | K   | N   | L   | G   |
|                       |     |     |     |     |     |     |     |     |     |     |
| <b>W_RNR1</b>         | GTC | ATC | AAG | TCA | TCA | AAC | TTA | TGC | TGT | GAA |
| <b>O_RNR1</b>         | GTT | ATT | AAA | TCT | TCT | AAT | CTA | TGT | TGT | GAA |
| <b>Rnr1 (421-430)</b> | V   | I   | K   | S   | S   | N   | L   | C   | C   | E   |
|                       |     |     |     |     |     |     |     |     |     |     |
| <b>W_RNR1</b>         | ATT | GTT | GAA | TAC | TCA | GCT | CCA | GAT | GAA | ACT |
| <b>O_RNR1</b>         | ATT | GTT | GAA | TAT | TCT | GCT | CCA | GAT | GAA | ACT |
| <b>Rnr1 (431-440)</b> | I   | V   | E   | Y   | S   | A   | P   | D   | E   | T   |
|                       |     |     |     |     |     |     |     |     |     |     |
| <b>W_RNR1</b>         | GCT | GTT | TGT | AAC | TTG | GCT | TCC | GTT | GCC | TTA |
| <b>O_RNR1</b>         | GCT | GTT | TGT | AAT | CTA | GCT | TCT | GTT | GCT | CTA |
| <b>Rnr1 (441-450)</b> | A   | V   | C   | N   | L   | A   | S   | V   | A   | L   |
|                       |     |     |     |     |     |     |     |     |     |     |
| <b>W_RNR1</b>         | CCA | GCA | TTC | ATT | GAA | ACT | TCT | GAG | GAT | GGT |
| <b>O_RNR1</b>         | CCA | GCT | TTC | ATT | GAA | ACT | TCT | GAA | GAT | GGT |
| <b>Rnr1 (451-460)</b> | P   | A   | F   | I   | E   | T   | S   | E   | D   | G   |
|                       |     |     |     |     |     |     |     |     |     |     |
| <b>W_RNR1</b>         | AAG | ACT | TCC | ACA | TAC | AAC | TTC | AAA | AAA | TTA |
| <b>O_RNR1</b>         | AAA | ACT | TCT | ACT | TAT | AAT | TTC | AAA | AAA | CTA |
| <b>Rnr1 (461-470)</b> | K   | T   | S   | T   | Y   | N   | F   | K   | K   | L   |
|                       |     |     |     |     |     |     |     |     |     |     |
| <b>W_RNR1</b>         | CAT | GAA | ATT | GCT | AAA | GTT | GTT | ACT | CGT | AAT |
| <b>O_RNR1</b>         | CAT | GAA | ATT | GCT | AAA | GTT | GTT | ACT | CGT | AAT |
| <b>Rnr1 (471-480)</b> | H   | E   | I   | A   | K   | V   | V   | T   | R   | N   |
|                       |     |     |     |     |     |     |     |     |     |     |
| <b>W_RNR1</b>         | TTA | AAC | AGA | GTC | ATT | GAT | CGT | AAT | TAC | TAC |
| <b>O_RNR1</b>         | CTA | AAT | CGT | GTT | ATT | GAT | CGT | AAT | TAT | TAT |
| <b>Rnr1 (481-490)</b> | L   | N   | R   | V   | I   | D   | R   | N   | Y   | Y   |
|                       |     |     |     |     |     |     |     |     |     |     |
| <b>W_RNR1</b>         | CCT | GTT | GAA | GAA | GCG | AGA | AAA | TCC | AAT | ATG |
| <b>O_RNR1</b>         | CCA | GTT | GAA | GAA | GCT | CGT | AAA | TCT | AAT | ATG |
| <b>Rnr1 (491-500)</b> | P   | V   | E   | E   | A   | R   | K   | S   | N   | M   |
|                       |     |     |     |     |     |     |     |     |     |     |
| <b>W_RNR1</b>         | AGA | CAT | AGA | CCA | ATT | GCT | TTG | GGT | GTT | CAA |

|                       |     |     |     |     |     |     |     |     |     |     |
|-----------------------|-----|-----|-----|-----|-----|-----|-----|-----|-----|-----|
| <b>O_RNR1</b>         | CGT | CAT | CGT | CCA | ATT | GCT | CTA | GGT | GTT | CAA |
| <b>Rnr1 (501-510)</b> | R   | H   | R   | P   | I   | A   | L   | G   | V   | Q   |
| <b>W_RNR1</b>         | GGT | CTC | GCT | GAC | ACT | TTC | ATG | CTG | TTA | CGT |
| <b>O_RNR1</b>         | GGT | CTA | GCT | GAT | ACT | TTC | ATG | CTA | CTA | CGT |
| <b>Rnr1 (511-520)</b> | G   | L   | A   | D   | T   | F   | M   | L   | L   | R   |
| <b>W_RNR1</b>         | TTG | CCA | TTT | GAT | TCT | GAG | GAA | GCC | CGT | TTG |
| <b>O_RNR1</b>         | CTA | CCA | TTC | GAT | TCT | GAA | GAA | GCT | CGT | CTA |
| <b>Rnr1 (521-530)</b> | L   | P   | F   | D   | S   | E   | E   | A   | R   | L   |
| <b>W_RNR1</b>         | CTA | AAT | ATC | CAA | ATC | TTT | GAA | ACT | ATT | TAT |
| <b>O_RNR1</b>         | CTA | AAT | ATT | CAA | ATT | TTC | GAA | ACT | ATT | TAT |
| <b>Rnr1 (531-540)</b> | L   | N   | I   | Q   | I   | F   | E   | T   | I   | Y   |
| <b>W_RNR1</b>         | CAT | GCC | TCC | ATG | GAA | GCT | TCT | TGT | GAA | CTA |
| <b>O_RNR1</b>         | CAT | GCT | TCT | ATG | GAA | GCT | TCT | TGT | GAA | CTA |
| <b>Rnr1 (541-550)</b> | H   | A   | S   | M   | E   | A   | S   | C   | E   | L   |
| <b>W_RNR1</b>         | GCT | CAG | AAG | GAC | GGT | CCA | TAC | GAA | ACT | TTC |
| <b>O_RNR1</b>         | GCT | CAG | AAA | GAT | GGT | CCA | TAT | GAA | ACT | TTC |
| <b>Rnr1 (551-560)</b> | A   | Q   | K   | D   | G   | P   | Y   | E   | T   | F   |
| <b>W_RNR1</b>         | CAA | GGA | TCT | CCT | GCT | TCT | CAA | GGT | ATA | CTA |
| <b>O_RNR1</b>         | CAA | GGT | TCT | CCA | GCT | TCT | CAA | GGT | ATT | CTA |
| <b>Rnr1 (561-570)</b> | Q   | G   | S   | P   | A   | S   | Q   | G   | I   | L   |
| <b>W_RNR1</b>         | CAG | TTT | GAT | ATG | TGG | GAC | CAA | AAA | CCC | TAC |
| <b>O_RNR1</b>         | CAG | TTC | GAT | ATG | TGG | GAT | CAA | AAA | CCA | TAT |
| <b>Rnr1 (571-580)</b> | Q   | F   | D   | M   | W   | D   | Q   | K   | P   | Y   |
| <b>W_RNR1</b>         | GGC | ATG | TGG | GAT | TGG | GAC | ACC | TTA | AGA | AAA |
| <b>O_RNR1</b>         | GGT | ATG | TGG | GAT | TGG | GAT | ACT | CTA | CGT | AAA |
| <b>Rnr1 (581-590)</b> | G   | M   | W   | D   | W   | D   | T   | L   | R   | K   |
| <b>W_RNR1</b>         | GAT | ATC | ATG | AAG | CAT | GGT | GTT | AGA | AAT | TCC |
| <b>O_RNR1</b>         | GAT | ATT | ATG | AAA | CAT | GGT | GTT | CGT | AAT | TCT |
| <b>Rnr1 (591-600)</b> | D   | I   | M   | K   | H   | G   | V   | R   | N   | S   |
| <b>W_RNR1</b>         | TTG | ACC | ATG | GCA | CCA | ATG | CCT | ACT | GCA | TCC |
| <b>O_RNR1</b>         | CTA | ACT | ATG | GCT | CCA | ATG | CCA | ACT | GCT | TCT |



|                       |     |     |     |     |     |     |     |     |     |     |
|-----------------------|-----|-----|-----|-----|-----|-----|-----|-----|-----|-----|
| <b>Rnr1 (601-610)</b> | L   | T   | M   | A   | P   | M   | P   | T   | A   | S   |
| <b>W_RNR1</b>         | ACA | TCC | CAA | ATA | TTG | GGT | TAT | AAT | GAA | TGT |
| <b>O_RNR1</b>         | ACT | TCT | CAA | ATT | CTA | GGT | TAT | AAT | GAA | TGT |
| <b>Rnr1 (611-620)</b> | T   | S   | Q   | I   | L   | G   | Y   | N   | E   | C   |
| <b>W_RNR1</b>         | TTC | GAA | CCA | GTC | ACT | TCC | AAT | ATG | TAC | TCC |
| <b>O_RNR1</b>         | TTC | GAA | CCA | GTT | ACT | TCT | AAT | ATG | TAT | TCT |
| <b>Rnr1 (621-630)</b> | F   | E   | P   | V   | T   | S   | N   | M   | Y   | S   |
| <b>W_RNR1</b>         | CGT | CGT | GTC | TTA | TCC | GGT | GAA | TTC | CAG | GTT |
| <b>O_RNR1</b>         | CGT | CGT | GTT | CTA | TCT | GGT | GAA | TTC | CAG | GTT |
| <b>Rnr1 (631-640)</b> | R   | R   | V   | L   | S   | G   | E   | F   | Q   | V   |
| <b>W_RNR1</b>         | GTG | AAC | CCT | TAC | TTA | CTG | CGT | GAC | TTG | GTT |
| <b>O_RNR1</b>         | GTT | AAT | CCA | TAT | CTA | CTA | CGT | GAT | CTA | GTT |
| <b>Rnr1 (641-650)</b> | V   | N   | P   | Y   | L   | L   | R   | D   | L   | V   |
| <b>W_RNR1</b>         | GAT | TTA | GGT | ATT | TGG | GAT | GAG | GGT | ATG | AAA |
| <b>O_RNR1</b>         | GAT | CTA | GGT | ATT | TGG | GAT | GAA | GGT | ATG | AAA |
| <b>Rnr1 (651-660)</b> | D   | L   | G   | I   | W   | D   | E   | G   | M   | K   |
| <b>W_RNR1</b>         | CAG | TAT | CTG | ATT | ACA | CAA | AAT | GGC | TCC | ATT |
| <b>O_RNR1</b>         | CAG | TAT | CTA | ATT | ACT | CAA | AAT | GGT | TCT | ATT |
| <b>Rnr1 (661-670)</b> | Q   | Y   | L   | I   | T   | Q   | N   | G   | S   | I   |
| <b>W_RNR1</b>         | CAA | GGC | TTA | CCA | AAC | GTT | CCA | CAA | GAA | TTG |
| <b>O_RNR1</b>         | CAA | GGT | CTA | CCA | AAT | GTT | CCA | CAA | GAA | CTA |
| <b>Rnr1 (671-680)</b> | Q   | G   | L   | P   | N   | V   | P   | Q   | E   | L   |
| <b>W_RNR1</b>         | AAG | GAC | TTA | TAC | AAG | ACT | GTT | TGG | GAA | ATT |
| <b>O_RNR1</b>         | AAA | GAT | CTA | TAT | AAA | ACT | GTT | TGG | GAA | ATT |
| <b>Rnr1 (681-690)</b> | K   | D   | L   | Y   | K   | T   | V   | W   | E   | I   |
| <b>W_RNR1</b>         | TCA | CAA | AAG | ACT | ATC | ATT | AAC | ATG | GCA | GCC |
| <b>O_RNR1</b>         | TCT | CAA | AAA | ACT | ATT | ATT | AAT | ATG | GCT | GCT |
| <b>Rnr1 (691-700)</b> | S   | Q   | K   | T   | I   | I   | N   | M   | A   | A   |
| <b>W_RNR1</b>         | GAT | CGT | TCT | GTC | TAT | ATT | GAT | CAA | TCT | CAT |
| <b>O_RNR1</b>         | GAT | CGT | TCT | GTT | TAT | ATT | GAT | CAA | TCT | CAT |
| <b>Rnr1 (701-710)</b> | D   | R   | S   | V   | Y   | I   | D   | Q   | S   | H   |



|                       |     |     |     |     |     |     |     |     |     |     |
|-----------------------|-----|-----|-----|-----|-----|-----|-----|-----|-----|-----|
| <b>W_RNR1</b>         | GCT | TCA | AGA | GAG | GCA | TCT | CCA | GCT | CCA | ACA |
| <b>O_RNR1</b>         | GCT | TCT | CGT | GAA | GCT | TCT | CCA | GCT | CCA | ACT |
| <b>Rnr1 (811-820)</b> | A   | S   | R   | E   | A   | S   | P   | A   | P   | T   |
|                       |     |     |     |     |     |     |     |     |     |     |
| <b>W_RNR1</b>         | GGT | AGC | CAC | TCA | TTA | ACT | AAA | GGA | ATG | GCA |
| <b>O_RNR1</b>         | GGT | TCT | CAT | TCT | CTA | ACT | AAA | GGT | ATG | GCT |
| <b>Rnr1 (821-830)</b> | G   | S   | H   | S   | L   | T   | K   | G   | M   | A   |
|                       |     |     |     |     |     |     |     |     |     |     |
| <b>W_RNR1</b>         | GAA | TTA | AAC | GTT | CAA | GAG | TCT | AAG | GTA | GAA |
| <b>O_RNR1</b>         | GAA | CTA | AAT | GTT | CAA | GAA | TCT | AAA | GTT | GAA |
| <b>Rnr1 (831-840)</b> | E   | L   | N   | V   | Q   | E   | S   | K   | V   | E   |
|                       |     |     |     |     |     |     |     |     |     |     |
| <b>W_RNR1</b>         | GTT | CCT | GAA | GTA | CCT | GCC | CCA | ACT | AAG | AAT |
| <b>O_RNR1</b>         | GTT | CCA | GAA | GTT | CCA | GCT | CCA | ACT | AAA | AAT |
| <b>Rnr1 (841-850)</b> | V   | P   | E   | V   | P   | A   | P   | T   | K   | N   |
|                       |     |     |     |     |     |     |     |     |     |     |
| <b>W_RNR1</b>         | GAA | GAA | AAA | GCT | GCC | CCC | ATC | GTT | GAT | GAT |
| <b>O_RNR1</b>         | GAA | GAA | AAA | GCT | GCT | CCA | ATT | GTT | GAT | GAT |
| <b>Rnr1 (851-860)</b> | E   | E   | K   | A   | A   | P   | I   | V   | D   | D   |
|                       |     |     |     |     |     |     |     |     |     |     |
| <b>W_RNR1</b>         | GAG | GAA | ACC | GAG | TTC | GAC | ATT | TAC | AAC | TCT |
| <b>O_RNR1</b>         | GAA | GAA | ACT | GAA | TTC | GAT | ATT | TAT | AAT | TCT |
| <b>Rnr1 (861-870)</b> | E   | E   | T   | E   | F   | D   | I   | Y   | N   | S   |
|                       |     |     |     |     |     |     |     |     |     |     |
| <b>W_RNR1</b>         | AAG | GTT | ATA | GCA | TGT | GCT | ATT | GAT | AAC | CCA |
| <b>O_RNR1</b>         | AAA | GTT | ATT | GCT | TGT | GCT | ATT | GAT | AAT | CCA |
| <b>Rnr1 (871-880)</b> | K   | V   | I   | A   | C   | A   | I   | D   | N   | P   |
|                       |     |     |     |     |     |     |     |     |     |     |
| <b>W_RNR1</b>         | GAA | GCT | TGT | GAA | ATG | TGT | TCG | GGT | TAA |     |
| <b>O_RNR1</b>         | GAA | GCT | TGT | GAA | ATG | TGT | TCT | GGT | TAA |     |
| <b>Rnr1 (881-888)</b> | E   | A   | C   | E   | M   | C   | S   | G   | *   |     |

## Supplemental Table S2 (A)

| Primer                                     | Sequence                                     |
|--------------------------------------------|----------------------------------------------|
| TRM9 +/- 40 BP FORWARD                     | 5'-TGAACAGAGATGAGGTCTCGAA-3'                 |
| TRM9 +/- 40 BP REVERSE                     | 5'-TCGTAATACCTGCTGCTACAAAA-3'                |
| TRM9 +/- 500 BP forward                    | 5'-TGACCTGGGTTTTGTTTAGGG-3'                  |
| TRM9 +/- 500 BP reverse                    | 5'-TTTCTCTGGTTGGTGCCTTT-3'                   |
| TRM9 +500 BP BAMHI<br>Forward              | 5'-ATGTATCTTCGGGATCCTGACCTGGGTTTTGTTTAGGG-3' |
| TRM9 -500 BP SACL Reverse<br>in HO plasmid | 5'-TAGTGATCAGTCGAGCTCTTTCTCTGGTTGGTGCCTTT-3' |
| UBI4 Probe forward                         | 5'- CGTTGCATTTGGTGTGAGAT-3'                  |
| UBI4 Probe reverse                         | 5'- TCAGTTACCACCCCTCAACC-3'                  |
| IRE1 Probe forward                         | 5'- TACTGCCGATCAGCAAACAG-3'                  |
| IRE1 Probe reverse                         | 5'-TAGGTTTGGAAAACGCTTGG-3'                   |
| KAR2 Probe forward                         | 5'-AACAGACTAAGCGCTGGCAA-3'                   |
| KAR2 Probe reverse                         | 5'-CAAACGTTCAAACCAGCGA-3'                    |
| HAC1 Probe forward                         | 5'-TCGCACTCGTCGTCTGATAC-3'                   |
| HAC1 Probe reverse                         | 5'-AAATGAATTCAAACCTGACTGC-3'                 |
| <i>ACT1</i> probe forward                  | 5'-TGGAAAAGATCTGGCATCATA-3'                  |
| <i>ACT1</i> probe forward                  | 5'-GGGGCTCTGAATCTTTCGTTA-3'                  |
| <i>SSA4</i> probe forward                  | 5'-TGACGAACGATGCTAAGCATT-3'                  |
| <i>SSA4</i> probe reverse                  | 5'-CAAATCTTGCCCTTGTAATGG-3'                  |
| <i>RNR1</i> Probe forward                  | 5'-TTTCCAAAACGCTGGTGGT-3'                    |
| <i>RNR1</i> Probe reverse                  | 5'-TTTCAATGAATGCTGGTAAGG-3'                  |
| <i>YEF3</i> Probe forward                  | 5'-AGTACATTGCCGCCATTGGT-3'                   |
| <i>YEF3</i> Probe reverse                  | 5'-CATTTTCATCGGTGAAACCGAA-3'                 |

**Supplemental Table S2 (B)**

| <b>Name</b> | <b>Type</b>                                       | <b>Genotype</b>                                                                                                                           |
|-------------|---------------------------------------------------|-------------------------------------------------------------------------------------------------------------------------------------------|
| BY4741      | Wild-type                                         | <i>Mata his3Δ leu2Δ met15Δ ura3Δ</i>                                                                                                      |
| YML014W-K   | <i>trm9Δ</i> KanMX                                | <i>Mata his3Δ leu2Δ met15Δ ura3Δ trm9Δ::kanMX4</i>                                                                                        |
| YML014W-U   | <i>trm9Δ</i> Ura3                                 | <i>Mata his3Δ leu2Δ met15Δ ura3Δ trm9Δ::URA3</i>                                                                                          |
| AWY14W      | Wild-type Reporter                                | <i>MATa UPRE-P<sub>CYC1(-178)</sub>-LEU2::HIS3 UPRE-P<sub>CYC1(-178)</sub>-lacZ::TRP1</i>                                                 |
| AWY014WK    | AWY14W <i>trm9Δ</i> KanMX                         | <i>MATa UPRE-P<sub>CYC1(-178)</sub>-LEU2::HIS3 UPRE-P<sub>CYC1(-178)</sub>-lacZ::TRP1 trm9Δ::kamMX4</i>                                   |
| AWY014WU    | AWY14W <i>trm9Δ</i> Ura3                          | <i>MATa UPRE-P<sub>CYC1(-178)</sub>-LEU2::HIS3 UPRE-P<sub>CYC1(-178)</sub>-lacZ::TRP1 trm9Δ::URA3</i>                                     |
| AWY014WKC   | AWY14W <i>trm9Δ</i> KanMX<br>+<br>TRM9 complement | <i>MATa UPRE-P<sub>CYC1(-178)</sub>-LEU2::HIS3 UPRE-P<sub>CYC1(-178)</sub>-lacZ::TRP1 trm9Δ::kamMX4 HO-hisG-URA3-hisG-TRM9+/-500bp-HO</i> |
| AWY014WUC   | AWY14W <i>trm9Δ</i> KanMX<br>+<br>TRM9 complement | <i>MATa UPRE-P<sub>CYC1(-178)</sub>-LEU2::HIS3 UPRE-P<sub>CYC1(-178)</sub>-lacZ::TRP1 trm9Δ::kamMX4 HO-HIS3-TRM9+/-500bp-HO</i>           |
| AWY19       |                                                   | <i>MATa UPRE-P<sub>CYC1(-178)</sub>-LEU2::HIS3 UPRE-P<sub>CYC1(-178)</sub>-lacZ::TRP1 ire1Δ</i>                                           |
| AWY19014WK  | AWY19 <i>trm9Δ</i> KanMX                          | <i>MATa UPRE-P<sub>CYC1(-178)</sub>-LEU2::HIS3 UPRE-P<sub>CYC1(-178)</sub>-lacZ::TRP1 ire1Δ trm9Δ::kamMX4</i>                             |
| CEN.PK2-1C  | Wild-type                                         | <i>MATa; ura3-52; trp1-289; leu2-3,112; his3 Δ1; MAL2-8<sup>C</sup>; SUC2</i>                                                             |
| CEN.PK2-1C  | CEN.PK2-1C <i>trm9Δ</i><br><i>trm9Δ</i>           | <i>MATa; ura3-52; trp1-289; leu2-3,112; his3 Δ1; MAL2-8<sup>C</sup>; SUC2, trm9Δ::TRP1</i>                                                |
